# Supplementary material for: Tuning the dimension of POM-based inorganic–organic hybrids from 3D self-penetrating framework to 1D poly-pendant chain via changing POM clusters and introducing secondary spacers
Source: Royal Society of Chemistry journal article supplement (doi:10.1039/c3ce42064g), 2013-12-04
Supplement: c3ce42064g.pdf [file c3ce42064g.pdf]

Electric Supplemental Information for:

## **Tuning the Dimension of the POM-based Inorganic-organic Hybrids from 3D Self-penetrating Framework to 1D Poly-pendant Chain *via* Changing POM Clusters and Introducing Secondary Spacers†**

**Shaobin Li, Huiyuan Ma\*, Haijun Pang\*, Zhuanfang Zhang, Yan Yu, Heng Liu and Tingting Yu**

### **Table of contents:**

1. **Table S1.** Summarization of typical POM-based hybrids constructed by mixed-ligands.
2. **Fig. S1** The two kinds of TMCs in **1**.
3. **Fig. S2** The process of 2D layers is formed in **1**.
4. **Fig. S3** The infinite organic-inorganic hybrid chain formed by  $\beta$ -Mo<sub>8</sub> anions and subunit C in **1**.
5. **Fig. S4** The detailed view of the self-penetrating structure in **1**.
6. **Fig. S5** View of the interdigitated structure in **3**.
7. **Fig. S6** Combined polyhedral/ball/stick representation of the infinite 1D Poly-pendant chain in **4**.
8. **Fig. S7** The IR spectra of compounds **1-4**.
9. **Fig. S8** The simulative (black) and experimental (red) powder X-ray diffraction patterns for **1-4**.
10. **Fig. S9** Solid-state emission spectra of pzta ligand at room temperature.
11. **Fig. S10** The CVs of **1-CPE** (left) and **2-CPE** (right) in the 1 M H<sub>2</sub>SO<sub>4</sub> solution at the scan rate of 50 mV·s<sup>-1</sup>.
12. **Fig. S11** (a) Reduction of H<sub>2</sub>O<sub>2</sub> and (b) oxidation of AA for **2-CPE** in 1M H<sub>2</sub>SO<sub>4</sub> solution at the scan rate of 50 mV·s<sup>-1</sup>.

**Table S1** Summarization of typical POM-based hybrids constructed by mixed-ligands

| Compounds                                                                                                                                                                                                                                                           | Ligands 1 and 2        | Types of mixed-ligands | References                                                          |
|---------------------------------------------------------------------------------------------------------------------------------------------------------------------------------------------------------------------------------------------------------------------|------------------------|------------------------|---------------------------------------------------------------------|
| 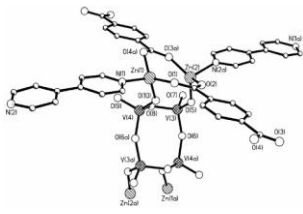 <p>[Zn<sub>2</sub>(tp)(4,4'-bpy)V<sub>2</sub>O<sub>6</sub>]</p>                                                                                                                   | tp<br>4,4'-bpy         | <b>I</b>               | <i>Tong and Chen et al., J. Chem. Soc., Dalton Trans.</i> 2001, 770 |
|  <p>[Cu(4,4'-bpy)(nic)(H<sub>2</sub>O)]<sub>2</sub>Mo<sub>8</sub>O<sub>26</sub></p>                                                                                                | nic<br>4,4'-bpy        | <b>I</b>               | <i>Lu et al., Chem. Mater.</i> 2002, 14, 2649                       |
|  <p>[{Cu<sup>II</sup>(2,2'-bpy)}{Cu<sup>II</sup>(IN)<sub>2</sub>}{Mo<sub>4</sub>O<sub>12</sub>(OH)<sub>2</sub>}]</p>                                                              | IN<br>2,2'-bpy         | <b>I</b>               | <i>Wang et al., Inorg. Chem.</i> 2003, 42, 6956                     |
|  <p>[Ni<sub>2</sub>(4,4'-bpy)<sub>3</sub>(H<sub>2</sub>O)<sub>2</sub>(ox)][P<sub>2</sub>W<sub>18</sub>O<sub>62</sub>]<sub>2</sub><br/>(H<sub>2</sub>4,4'-bpy)·H<sub>2</sub>O</p> | ox<br>4,4'-bpy         | <b>I</b>               | <i>Liu and Su et al., Inorg. Chem.</i> 2008, 47, 7133               |
|  <p>[Co(en)<sub>2</sub>][Co(2,2'-bipy)<sub>2</sub>]<br/>-[PMo<sup>VI</sup><sub>5</sub>Mo<sup>V</sup><sub>3</sub>V<sup>IV</sup><sub>8</sub>O<sub>44</sub>]-4.5H<sub>2</sub>O</p>  | en<br>2,2'-bipy        | <b>II</b>              | <i>Zhang and Zhu et al. Chem. Commun.</i> 2002, 1416                |
|  <p>[4,4'-Hbipy][{Cu<sub>2</sub>(2,2'-bipy)<sub>2</sub>(4,4'-bpy)<sub>2.5</sub>}</p>                                                                                             | 2,2'-bipy<br>4,4'-bipy | <b>II</b>              | <i>Dolbecq et al. Dalton Trans.</i> 2005, 3919                      |

|                                                                                                                                                                                                                                                                                                                                                                                                                                                                                                                                                                                                                                                                                                                                                 |                                |                   |                                                                                                          |
|-------------------------------------------------------------------------------------------------------------------------------------------------------------------------------------------------------------------------------------------------------------------------------------------------------------------------------------------------------------------------------------------------------------------------------------------------------------------------------------------------------------------------------------------------------------------------------------------------------------------------------------------------------------------------------------------------------------------------------------------------|--------------------------------|-------------------|----------------------------------------------------------------------------------------------------------|
| <p><math>-\text{PW}_{11}\text{CuO}_{39}] \cdot 16\text{H}_2\text{O}</math></p> 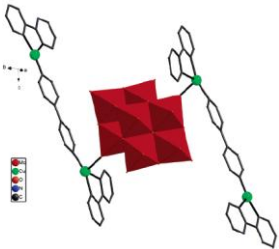 <p><math>\text{K}[\{\text{Cu}^{\text{I}}(2,2'\text{-bipy})\}(4,4'\text{-bipy})</math><br/> <math>-\{\text{Cu}^{\text{I}}(2,2'\text{-bipy})\}_{0.5}\}_2[\text{Mo}_8\text{O}_{26}]</math></p>                                                                                                                                                                                                                                                                                                                                                                                    | <p>2,2'-bipy<br/>4,4'-bipy</p> | <p><b>II</b></p>  | <p><i>Wang et al.,</i><br/><i>Cryst. Growth</i><br/><i>Des.</i> 2006, 6,<br/>2693</p>                    |
|  <p><math>[\text{GeMo}^{\text{V}}_8\text{Mo}^{\text{VI}}_4\text{O}_{36}(\mu_2\text{-OH})_4\{\text{Ni}(\text{pda})(\text{H}_2\text{O})\}_2</math><br/> <math>-\{\text{Ni}(\text{pda})\}\{\text{Ni}(\text{pda})(\text{bpe})\}(\text{bpe})_{0.5}]</math> (<b>1</b>)</p>  <p><math>[\text{GeMo}^{\text{V}}_8\text{Mo}^{\text{VI}}_4\text{O}_{36}(\mu_2\text{-OH})_4\{\text{Ni}(\text{pda})\}_2</math><br/> <math>-\{\text{Ni}(\text{pda})(4,4'\text{-bpy})_{0.5}\}\{\text{Ni}(\text{pda})(4,4'\text{-bpy})\}]</math><br/> <math>\cdot 7\text{H}_2\text{O}</math> (<b>2</b>)</p> | <p>pda<br/>bpe</p>             | <p><b>II</b></p>  | <p><i>Xu et al.,</i><br/><i>CrystEngComm.</i><br/>2009, 11, 2488</p>                                     |
|  <p><math>[\text{Cu}_6(\text{trz})_2(\text{bbtz})_2(\text{SiW}_{12}\text{O}_{40})]</math></p>                                                                                                                                                                                                                                                                                                                                                                                                                                                                                                                                                                | <p>trz<br/>bbtz</p>            | <p><b>III</b></p> | <p><i>Peng and Su et</i><br/><i>al.,</i><br/><i>Cryst. Growth</i><br/><i>Des.</i> 2010, 10,<br/>1104</p> |
|  <p><math>[\text{Cu}_3(2\text{-pytz})_4(4,4'\text{-bpy})][\text{H}_2\text{SiMo}_{12}\text{O}_{40}]</math></p>                                                                                                                                                                                                                                                                                                                                                                                                                                                                                                                                                | <p>2-pytz<br/>4,4'-bipy</p>    | <p><b>III</b></p> | <p><i>Yan et al.,</i><br/><i>Dalton Trans.,</i><br/>2013, 42, 1667</p>                                   |

|                                                                                                                                                                                                                                                                                                                                                                                                                                                                                                                              |                                                |                   |                  |
|------------------------------------------------------------------------------------------------------------------------------------------------------------------------------------------------------------------------------------------------------------------------------------------------------------------------------------------------------------------------------------------------------------------------------------------------------------------------------------------------------------------------------|------------------------------------------------|-------------------|------------------|
| 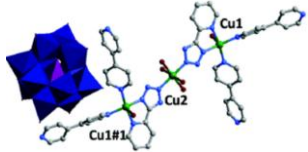 <p>[Cu<sub>3</sub>(2-pytz)<sub>2</sub>(4,4'-bpy)<sub>4</sub>(H<sub>2</sub>O)<sub>6</sub>]<br/>             -[H<sub>4</sub>SiW<sub>12</sub>O<sub>40</sub>]<sub>2</sub>·6H<sub>2</sub>O</p>                                                                                                                                                                                                                                                  |                                                |                   |                  |
|  <p>Cu<sub>4</sub>(pzta)<sub>2</sub>(4,4'-bipy)(H<sub>2</sub>O)<sub>4</sub>(OH)<sub>2</sub><br/>             -[Mo<sub>8</sub>O<sub>26</sub>]<sub>2</sub>·2H<sub>2</sub>O</p>  <p>[Cu<sub>2</sub>(pzta)<sub>2</sub>(4,4'-bipy)<sub>2</sub>(H<sub>2</sub>O)<sub>2</sub>]<br/>             -[HPW<sub>12</sub>O<sub>40</sub>]<sub>2</sub>·8H<sub>2</sub>O</p> | <p>pzta<br/>                     4,4'-bipy</p> | <p><b>III</b></p> | <p>This work</p> |

The abbreviations in the table: tp = terephthalate, 2,2'-bipy = 2,2'-bipyridine, 4,4'-bipy = 4,4'-bipyridine, nic = nicotinic acid, IN = isonicotinateion, ox = oxalic acid, en = ethylenediamine, pda = 1,2-propanediamine, bpe = 1,2-bis(4-pyridine)-ethane, trz = 1-H-1,2,4-triazole, bbtz = 1,4-bis(1,2,4-triazol-1-ylmethyl)benzene, 2-pytz = 5-(2-pyridyl)tetrazolate, pzta = 5-(2-pyrazinyl) tetrazole.

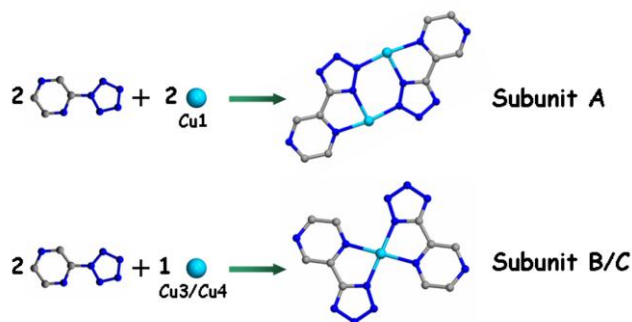

**Fig. S1** The two kinds of TMCs in **1**.

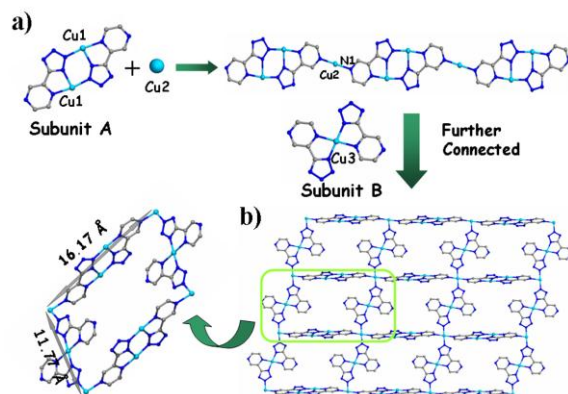

**Fig. S2** (a) Ball/stick representation of subunit A, subunit B, infinite organic-inorganic hybrid chain formed by subunit A and Cu2, (b) 2D layers formed by subunit B further connected in **1**.

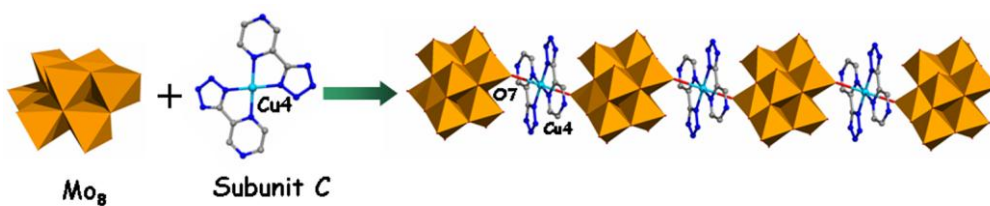

**Fig. S3** Ball/stick representation of subunit C, infinite organic-inorganic hybrid chain formed by  $\beta$ -Mo<sub>8</sub> anions and subunit C.

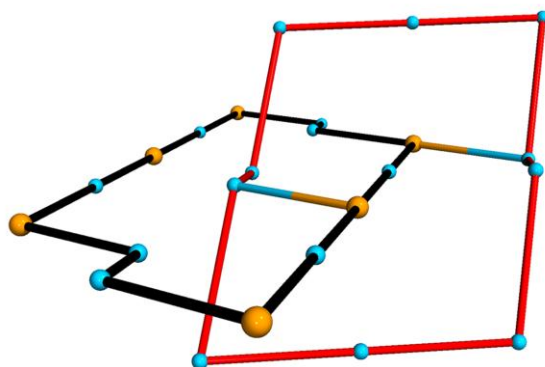

**Fig. S4** The detailed view of the self-penetrating structure in **1**.

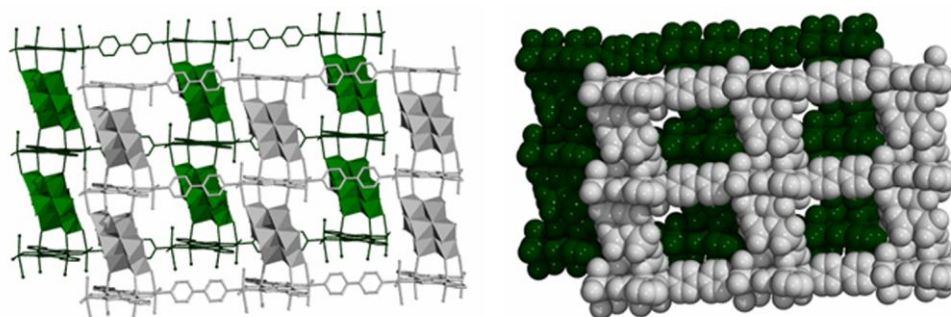

**Fig. S5** View of the interdigitated structure in **3**.

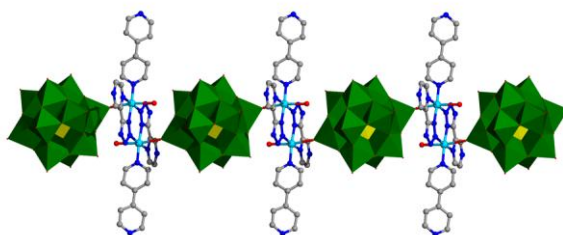

**Fig. S6** Combined polyhedral/ball/stick representation of the infinite 1D Poly-pendant chain.

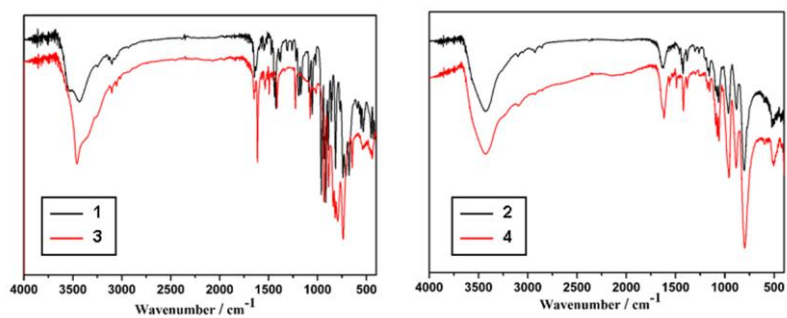

**Fig. S7** The IR spectra of compounds **1-4**.

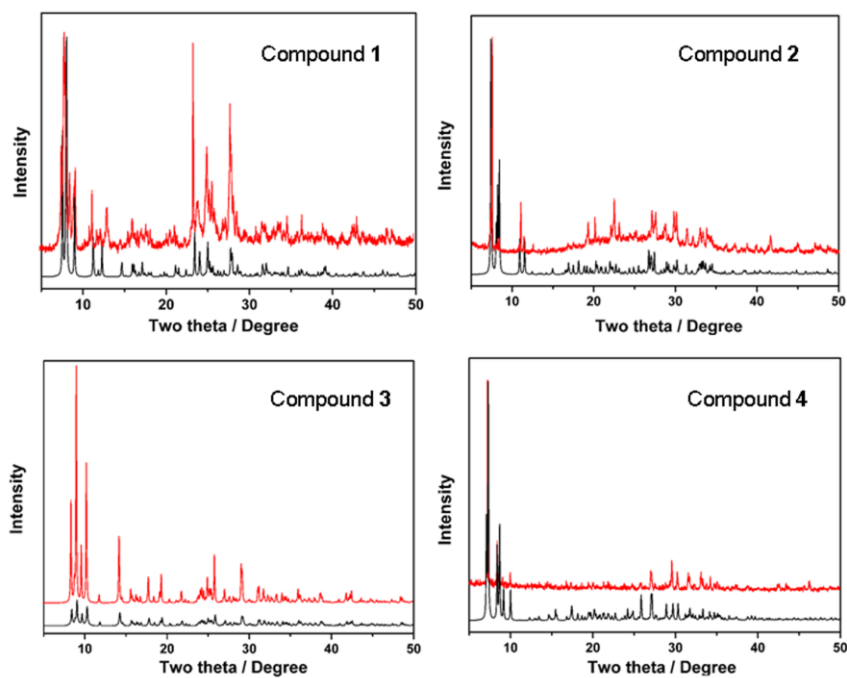

**Fig. S8** The simulative (black) and experimental (red) powder X-ray diffraction patterns for **1-4**.

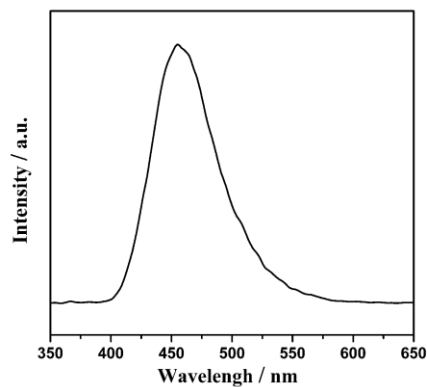

**Fig. S9** Solid-state emission spectra of pzta ligand at room temperature.

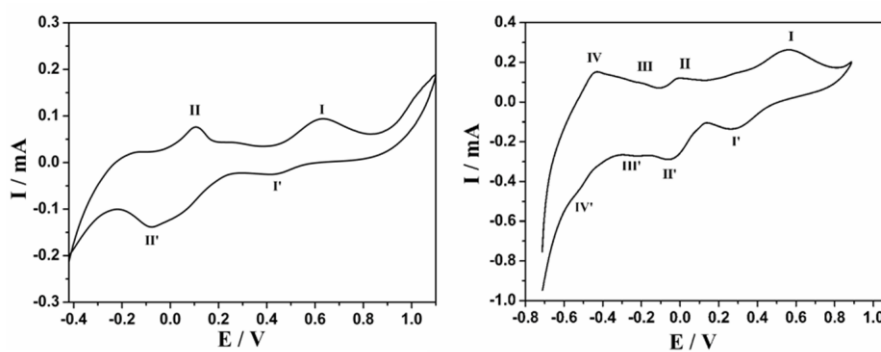

**Fig. S10** The CVs of **1**-CPE (left) and **2**-CPE (right) in the 1 M H<sub>2</sub>SO<sub>4</sub> solution at the scan rate of 50 mV·s<sup>-1</sup>.

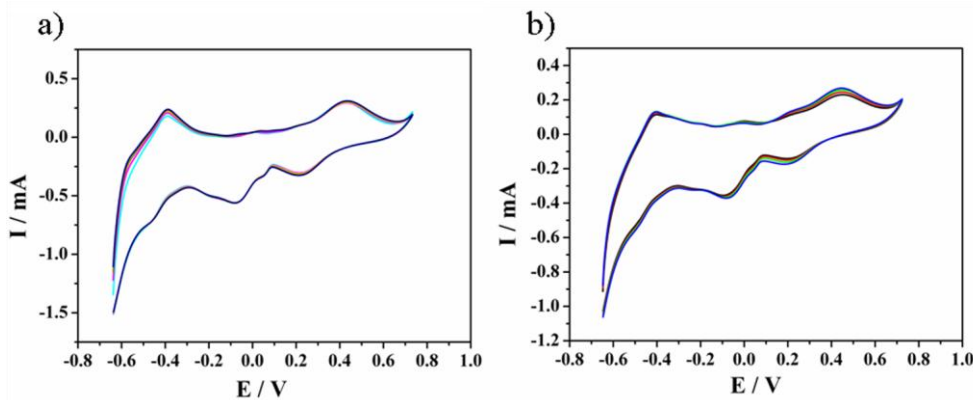

**Fig. S11** (a) Reduction of H<sub>2</sub>O<sub>2</sub> and (b) oxidation of AA for **2**-CPE in 1M H<sub>2</sub>SO<sub>4</sub> solution (scan rate: 50 mV·s<sup>-1</sup>). The concentrations (from inner to outer) are 0.0, 10, 20, 30 mM for H<sub>2</sub>O<sub>2</sub> and 0.0, 0.1, 0.2, 0.3 mM for AA.
